1  
2  
3  
4  
5  
6  
7  
8  
9  
10  
11  
12  
13  
14  
15  
16  
17  
18  
19  
20  
21  
22  
23  
24  
25

**Development of spike receptor-binding domain nanoparticle as a vaccine candidate  
against SARS-CoV-2 infection in ferrets**

Young-Il Kim<sup>†1,2</sup>, Dokyun Kim<sup>†3</sup>, Kwang-Min Yu<sup>1,2</sup>, Hogyu David Seo<sup>3</sup>, Shin-Ae Lee<sup>3</sup>,  
Mark Anthony B. Casel<sup>1,2</sup>, Seung-Gyu Jang<sup>1,2</sup>, Stephanie Kim<sup>3</sup>, WooRam Jung<sup>3</sup>, Chih-Jen Lai<sup>3</sup>,  
Young Ki Choi<sup>1,2#</sup>, Jae U. Jung<sup>3#</sup>

<sup>1</sup>College of Medicine and Medical Research Institute, Chungbuk National University, Cheongju,  
Republic of Korea

<sup>2</sup>Zoonotic Infectious Disease Research Center, Chungbuk National University, Cheongju,  
Republic of Korea

<sup>3</sup>Department of Cancer Biology and Global Center for Pathogens Research and Human Health,  
Lerner Research Institute, Cleveland Clinic, Cleveland, OH 44195, USA

#Correspondence: Address correspondence to  
Young Ki Choi, [choiki55@chungbuk.ac.kr](mailto:choiki55@chungbuk.ac.kr)  
Jae U. Jung, [jungj@ccf.org](mailto:jungj@ccf.org)

†These authors contributed equally to this work. Author order was determined in order of  
decreasing seniority.

26  
27  
28  
29  
30  
31  
32  
33  
34  
35  
36  
37  
38  
39  
40  
41  
42

## Abstract

**Severe acute respiratory syndrome coronavirus 2 (SARS-CoV-2), a causative agent of COVID-19 pandemic, enters host cells *via* the interaction of its Receptor-Binding Domain (RBD) of Spike protein with host Angiotensin-Converting Enzyme 2 (ACE2). Therefore, RBD is a promising vaccine target to induce protective immunity against SARS-CoV-2 infection. In this study, we report the development of RBD protein-based vaccine candidate against SARS-CoV-2 using self-assembling *H. pylori*-bullfrog ferritin nanoparticles as an antigen delivery. RBD-ferritin protein purified from mammalian cells efficiently assembled into 24-mer nanoparticles. 16-20 months-old ferrets were vaccinated with RBD-ferritin nanoparticles (RBD-nanoparticles) by intramuscular or intranasal inoculation. All vaccinated ferrets with RBD-nanoparticles produced potent neutralizing antibodies against SARS-CoV-2. Strikingly, vaccinated ferrets demonstrated efficient protection from SARS-CoV-2 challenge, showing no fever, body weight loss and clinical symptoms. Furthermore, vaccinated ferrets showed rapid clearance of infectious viruses in nasal washes and lungs as well as viral RNA in respiratory organs. This study demonstrates the Spike RBD-nanoparticle as an effective protein vaccine candidate against SARS-CoV-2.**

43

## Introduction

44

45

46

47

48

49

50

51

52

53

54

55

56

57

58

59

60

SARS-CoV-2, originally named 2019-nCoV upon initial isolation from Wuhan, China in December 2019, has caused a global outbreak of coronavirus disease-19 (COVID-19) with significant socioeconomic impacts (1, 2). From the continuously growing numbers of diagnoses and deaths, COVID-19 was declared a public health emergency of international concern (PHEIC) in January 2020 and soon declared a pandemic by WHO in March 2020 (3, 4). As of Jan 27<sup>th</sup> 2021, more than 100 million people have been infected with SARS-CoV-2, among which 2 million died (5). Although approximately 80% of the confirmed SARS-CoV-2 infections are asymptomatic or show mild flu-like symptoms, 20% of the infections progress to severe pneumonia and acute respiratory distress syndrome requiring hospitalization and mechanical ventilation (6, 7). The overwhelming number of SARS-CoV-2 patients has rapidly devastated the availability of health-care resources (8). Shortage of medical resources and staff in conjunction with the overwhelming number of patients have exacerbated the quality of medical care and eventually increased mortality rates of COVID-19 (9). Although a significant proportion of the infected patients have recovered, many of them report cardiovascular, pulmonary, and neurologic symptoms lasting after the recovery (10, 11). Thus, strong preventive measures are essential to halt the pandemic and its destructive effects on the global public health, as well as the economy.

61

62

63

64

65

66

67

68

SARS-CoV-2 is a member of the *Coronaviridae* family, carrying a single positive-stranded RNA genome within the viral envelope (2). Although at least seven coronaviruses are known as etiological agents of mild respiratory illnesses in human infection, the family has not been closely associated with severe illnesses until the relatively recent outbreaks of SARS-CoV, MERS-CoV, and SARS-CoV-2 (1, 12). Emergence of these pathogens and the COVID-19 pandemic have called for an urgent global research efforts to investigate the pathogenesis of coronaviruses. The SARS-CoV-2 RNA genome is approximately 30 kilobases and encodes for structural proteins such as –Spike (S), Envelope (E), Membrane (M), and Nucleocapsid (N)–

69 and non-structural proteins such as papain-like protease, chymotrypsin-like protease, and RNA-  
70 dependent RNA polymerase (13). The heavily glycosylated S protein protruding from the virion  
71 surface is the key bridge between the virus and the host cell, playing a crucial role in host cell  
72 receptor recognition, virion attachment, and ultimately entry into the host cell. S is a member of  
73 the Class I viral fusion protein which undergoes trimerization upon cleavage into S1 and S2  
74 domains by a host cellular protease, furin. While S1 confers specificity in cell tropism through its  
75 Receptor-Binding Domain (RBD) which directly interacts with the receptor of SARS-CoV-2,  
76 Angiotensin-Converting Enzyme 2 (ACE2), S2 mediates membrane fusion via formation of a  
77 trimeric hairpin structure from its heptad repeat domains (14). Therefore, S1 RBD has been  
78 considered as one of the most promising candidates in vaccine development to protect against  
79 Coronaviruses (15-17). Its efficacy has previously been shown to induce potent neutralizing  
80 antibodies against MERS-CoV (18). Furthermore, previous studies of neutralizing antibodies  
81 from naturally recovered patients of SARS-CoV-2 infections have mapped their epitopes to be  
82 S1 and RBD (19, 20), implicating RBD-targeting antibodies in successful immunity against  
83 SARS-CoV-2 (21-23). Thus, most of the currently developed vaccines against SARS-CoV-2,–  
84 despite of their diversity in vaccine approaches,– include RBD in their immunogens (24-28).

85 One major limitation of small soluble proteins alone as vaccine candidates is that our  
86 immune system only reacts efficiently against immunogens of nanometer range in size (29, 30).  
87 Therefore, many protein vaccines using viral proteins are developed into virus-like particles  
88 (VLPs) which are multiprotein structures that mimic the organization and conformation of native  
89 viruses, but lack the viral genome. However, this approach is limited to a few pathogens that are  
90 capable of self-assembling into VLPs upon overexpression of the viral protein, such as Hepatitis  
91 B virus (HBV) surface antigen (HBsAg) and Human Papillomavirus (HPV) L1 protein (31-33).  
92 Fortunately, the latest advances in molecular biology and nanotechnology have overcome this  
93 limitation by adopting nanoparticle engineering to serve as platforms for vaccines. The efficacy  
94 of these nanoparticle-engineered vaccines outperforms traditional vaccines, such as whole

95 inactivated vaccines of bacterial and viral pathogens (34-38). Moreover, recent studies have  
96 shed light on the immunological advantages of nanoparticle-based vaccines in nearly every step  
97 of the humoral and cellular immunity: efficient antigen transport to draining lymph nodes,  
98 antigen presentation by follicular dendritic and helper T cells, as well as high level of activation  
99 of the germinal centers (30, 39, 40). Among the genetically engineered nanoparticles, ferritin is  
100 the most well-characterized in the bionanotechnology field. Ferritin, ubiquitous through  
101 kingdoms of life, has a conserved role in minimizing damage to cell from reactive oxygen  
102 species formed from the Fenton reaction upon excess iron (II). Due to its natural tendency to  
103 self-assemble into 24-meric homopolymer and amenability via fusion peptides, ferritin is an  
104 ideal candidate for drug delivery and vaccine development (41, 42). Most importantly, its  
105 exceptional chemical and thermal stability does not require stringent temperature control,  
106 enabling streamlined distribution process, especially in areas with limited resources for cold-  
107 chain supplies (41, 43). One of the recently engineered ferritin for vaccine development is the  
108 self-assembling *Helicobacter pylori*-bullfrog (*Rana Catesbeiana*) hybrid ferritin which carries  
109 NH<sub>2</sub>-terminal residues from the lower subunit of bullfrog ferritin on the core of *Helicobacter pylori*  
110 ferritin to form radially projecting tails (38). The *H. pylori* ferritin-based nanoparticle has been  
111 reported to be an effective platform for vaccines to carry trimeric glycoproteins for presenting  
112 viral immunogens on its threefold axis points. Most importantly, it provides stronger protective  
113 immunity at a lower dose than soluble immunogens against Influenza and Epstein-Barr viruses,  
114 while minimizing the risk of autoimmunity through its genetic diversity from heavy and light  
115 chains of human ferritin (38, 44, 45).

116         Despite recent efforts to develop mouse models that fully recapitulates human SARS-  
117 CoV-2 infection, the current hACE2-transgenic mouse model fails to mimic pathogenic progress  
118 and symptoms of COVID-19 in humans. Ferrets (*Mustela putorius furo*) on the other hand, are  
119 naturally susceptible to human respiratory viruses—Respiratory Syncytial virus (48), Influenza  
120 virus (49, 50), and SARS-CoV (51, 52)—making ferret models ideal to study respiratory virus

121 infections in humans. In addition, ferrets share anatomy of upper and lower respiratory tracts,  
122 architecture of terminal bronchioles, and density of submucosal glands to those of humans (46,  
123 47). Recently, we and others have shown that SARS-CoV-2-infected ferrets develop immune  
124 responses and pathogenic progress similar to humans', and shed virus through nasal wash,  
125 saliva, urine, and fecal samples, which highly recapitulate human SARS-CoV-2 infection (53-  
126 56). Furthermore, we have also demonstrated the efficacy of the ferret model in drug discovery  
127 for SARS-CoV-2 (57). Thus, ferrets represent an infection and transmission animal model of  
128 SARS-CoV-2 that should facilitate the development of SARS-CoV-2 therapeutics and vaccines.

129 Here, we demonstrate the immunogenic efficacy of self-assembling spike RBD-ferritin  
130 nanoparticle (RBD-nanoparticle) as an efficient SARS-CoV-2 vaccine antigen. We purified the  
131 RBD-nanoparticle from transfected HEK293T cells and immunized ferrets via intramuscular (IM)  
132 and intranasal (IN) routes to monitor the induction of neutralizing antibodies. Furthermore, we  
133 challenged the vaccinated ferrets with SARS-CoV-2 and observed protective immunity against  
134 SARS-CoV-2. Taken together, we propose the self-assembling RBD-nanoparticles as a  
135 potential vaccine candidate that effectively protects against SARS-CoV-2 infection.

136

137

## Results

### 138 **Purification and characterization of RBD-ferritin nanoparticles**

139 Kanekiyo et al. have discovered the use of engineered ferritin in vaccine developments  
140 by fusion with viral immunogens (38, 44). Briefly, the NH<sub>2</sub>-terminal tail from the lower subunit of  
141 bullfrog ferritin was fused to *H. pylori* ferritin so that the bullfrog-originated tail and viral  
142 immunogen were fused by the linker and presented on the threefold axis points of the *H. pylori*  
143 ferritin core. The human codon-optimized RBD of SARS-CoV-2 Wuhan-Hu-1 strain  
144 (NC\_045512) was fused to the IL-2 signal peptide at the amino terminus and the *H. pylori*-  
145 bullfrog ferritin at the carboxyl terminus to generate the RBD-ferritin fusion. A computer-assisted  
146 modeling predicts the 3D structure of RBD-ferritin nanoparticles with RBD forming radial  
147 projections on the threefold axis point of fully assembled nanoparticles (Fig. 1A). Ferritin and  
148 RBD-ferritin fusion proteins were readily purified from the supernatants of transfected HEK293T  
149 cells (Fig. 1B). To demonstrate the 24-mer self-assembly of ferritin nanoparticles, purified ferritin  
150 and RBD-ferritin proteins were subjected to size exclusion chromatography with columns  
151 designed to have a maximum resolution for proteins with kilodalton and megadalton ranges of  
152 molecular weight. As a result, the purified ferritin nanoparticles and RBD-nanoparticles showed  
153 peaks at approximately 408 kDa and 1350 kDa, respectively, corresponding to 24-mers of each  
154 protein (Fig. 1C). These results indicate that RBD-ferritin protein is readily purified from  
155 mammalian cells to homogeneity and efficiently assembles into 24-mer nanoparticles.

156

### 157 **Immunization with RBD-nanoparticle induces neutralizing antibody in ferrets**

158 To test the vaccine efficacy of purified RBD-nanoparticles, we immunized 16-20 months-  
159 old ferrets (n=10/immunization route), which is equivalent to 30 years of age in humans. While  
160 intramuscular (IM) immunization is the most widely used route for vaccine delivery, intranasal  
161 (IN) immunization closely resembles infection with respiratory pathogens and efficiently  
162 stimulates mucosal immunity (58). Ferrets were injected with 15µg RBD-nanoparticle via IM

163 route only or both IM and IN routes over 31 days with boosting immunizations at days 14 and 28  
164 (Fig. 2A). Blood was drawn from each ferret prior to primary and boosting immunizations on  
165 days 14 and 28. All ferrets vaccinated with RBD-nanoparticles produced strong neutralizing  
166 antibodies after the second boosting immunization performed at day 28. Neutralization titer did  
167 not show statistically significant difference between the routes of immunization (Fig. 2B). These  
168 data indicate that RBD-nanoparticle immunization induces strong neutralizing antibody  
169 regardless of the route of immunization.

170

### 171 **Immunization with RBD-nanoparticle promotes rapid viral clearance and protects ferrets** 172 **from SARS-CoV-2 challenge**

173 Immunized ferrets were challenged with  $10^{5.0}$  TCID<sub>50</sub>/mL of NMC2019-nCoV02 strain  
174 SARS-CoV-2 three days after the last immunization at day 31 and monitored for clinical  
175 symptoms resembling COVID-19. Ferrets with adjuvant only-immunization was included as  
176 control group. Over a total of 10 days from the day of challenge infection, ferrets with adjuvant  
177 only-immunization showed increase in body temperature and decrease in body weight (Fig. 3A).  
178 On the contrary, ferrets immunized with RBD-nanoparticle did not show any change in either  
179 body temperature or body weight (Fig. 3A and B). Minor body weight changes in ferrets  
180 immunized by IM route showed a statistically insignificant difference compared to the adjuvant  
181 only-immunized ferrets (Fig. 3B). On the other hand, ferrets immunized by IM and IN routes  
182 provided stronger protection with high statistical significance against body weight loss as shown  
183 by the minimal reduction of body weight followed by a constant increase thereafter (Fig. 3B).  
184 Nasal wash samples were collected every other day for 10 days after the virus challenge, and 3  
185 ferrets were sacrificed at 3 and 6 days post-infection (dpi) to harvest the lungs. Consistent with  
186 the trend shown in body temperature and weight, immunized ferrets showed rapid viral  
187 clearance in nasal washes (Fig. 3C) and lungs (Fig. 3D) of both groups of vaccinated ferrets. It



188 should be noted that IM and IN immunization showed slightly more effective viral clearance in  
189 nasal washes at 4 dpi than IM immunization (Fig. 3C).

190 To further investigate the potency of protective immunity by RBD-nanoparticle, we  
191 challenged the immunized ferrets with a higher titer ( $10^{6.0}$  TCID<sub>50</sub>/mL) of SARS-CoV-2 following  
192 the same immunization protocol (Fig. 2A). Consistently, RBD-nanoparticles-immunized ferrets  
193 showed no increase of body temperature compared to adjuvant only-immunized ferrets (Fig.  
194 S1). While adjuvant only-immunized ferrets suffered from cough, runny nose, and reduction in  
195 movement, RBD-nanoparticles-immunized ferrets showed only mild reduction in movement on  
196 the 2<sup>nd</sup> and 3<sup>rd</sup> days after the high virus titer challenge (Table 1). On the other hand, IN and IM  
197 immunization showed more potent protective immunity upon challenge with a high virus titer  
198 than IN immunization only (Fig. S2). IN and IM immunization led to faster clearance of infectious  
199 virus in nasal washes at 4 and 8 dpi than IM immunization alone (Fig. S2A). Infectious virus  
200 titers of lungs were also lower in IN and IM-immunized ferrets than in IM-immunized ferrets (Fig.  
201 S2B). These data demonstrate that RBD-nanoparticle induces strong protective immunity to  
202 suppress SARS-CoV-2-induced clinical symptoms and promote viral clearance. Moreover, a  
203 combination of IN and IM immunization induces stronger anti-viral immunity against challenge of  
204 high titer SARS-CoV-2 than IM immunization alone.

205

### 206 **RBD-ferritin vaccination blocks lung damage from SARS-CoV-2 challenge**

207 COVID-19 has most commonly been shown to be associated with a spectrum of lung  
208 damage. To compare lung histopathologies among immunized ferrets, RNAscope *in situ*  
209 hybridization and histopathological examination were conducted (Fig. 4). Lung tissues  
210 harvested from naïve ferrets were included as negative controls (Fig. 4D). RNAscope *in situ*  
211 hybridization results showed that the adjuvant only-immunized ferrets had a number of SARS-  
212 CoV-2 RNA-positive cells at 3 and 6 dpi with infiltration of numerous inflammatory immune cells  
213 (Fig. 4A-E). At 3 dpi, IM- or IM and IN-immunized ferrets showed considerable reduction of viral

214 RNAs in the lungs compared to adjuvant only-immunized ferrets (Fig. 4). At 6 dpi, lung tissues  
215 of IM- or IM and IN-immunized ferrets showed complete clearance of viral RNAs (Fig. 4F-G),  
216 while adjuvant only-immunized ferrets still showed high viral RNAs (Fig. 4E). Finally, IM- or IM  
217 and IN-immunized ferrets showed little or no infiltration of inflammatory immune cells in infected  
218 lung (Fig. 4B-G). These data show that RBD-nanoparticle immunization accelerates viral  
219 clearance in the lung and suppresses the infiltration of inflammatory immune cells.

220

## Discussion

221           Since the first discovery in Wuhan, China in late 2019, SARS-CoV-2 has rapidly spread  
222 around the world and was declared a pandemic in 3 months. Confirmed infection and death  
223 counts have skyrocketed to over 88 million infections and 2 million deaths, and the statistics are  
224 still on a continuous rise. Although 80% of the infections do not progress to severe COVID-19,  
225 the recent surge in infections and severe patients have led to subsequent increase in mortality  
226 rates (8, 9). While several vaccines were approved at accelerated rates (59, 60), additional  
227 indepth study of mRNA-based vaccines regarding safety concerns and long-term effects still  
228 need to be addressed as they are the first approved mRNA human vaccine of its kind.  
229 Moreover, taking the growing evidence of reinfections into consideration, recovered patients  
230 cannot be completely excluded from the population requiring vaccination (61-64). Therefore,  
231 there still is a constant need for alternative vaccine approaches against SARS-CoV-2 using  
232 relatively well-characterized approaches. Recent advances in nanotechnology has favorably  
233 allowed the application of nanoparticles in the field of vaccinology to develop safer yet potent  
234 vaccines. One of the most promising candidates is *H. pylori*-bullfrog ferritin that has been  
235 genetically engineered to carry a protruding tail from the bullfrog on the self-assembling ferritin  
236 core of *H. pylori*, and serves as a platform to build nanoparticles of immunogen. This approach  
237 has proven higher efficacy in lower dose than traditional protein subunit vaccines. This  
238 approach also highlights lower risk of vaccine-related adverse effects and potentially greater  
239 accessibility to the public with reduced production cost (38, 44, 45). Importantly, inherent  
240 stability of ferritin nanoparticles from heat and chemicals may shed light to remove the necessity  
241 of strict cold-chain supply required for the currently distributing mRNA-based vaccines (41).

242           SARS-CoV-2 carries Spike protein to attach to the host receptor ACE2, which triggers  
243 membrane fusion for entry into host cells. The RBD of Spike protein confers the specificity to  
244 bind ACE2 and therefore is a promising target for vaccine development throughout the  
245 *Coronaviridae* family. As also shown from previously developed vaccine candidates against

246 Coronaviruses (17, 65, 66), we selected the RBD as a vaccine antigen. However, soluble  
247 antigen is weakly immunogenic and therefore require higher dose of antigen along with an  
248 adjuvant, which correlates with higher risk of vaccine-related adverse effects (29). In this study,  
249 we engineered the fusion of SARS-CoV-2 Spike RBD with *H. pylori*-bullfrog ferritin to develop  
250 RBD-nanoparticle vaccine. Ferrets immunized with RBD-nanoparticles carried efficient  
251 neutralizing antibodies against SARS-CoV-2 and were protected from fever and body weight  
252 loss upon SARS-CoV-2 challenge. These clinical symptoms corresponded to the accelerated  
253 viral clearance in nasal washes and lungs following SARS-CoV-2 challenge. We further  
254 investigated the vaccine potential of RBD-nanoparticles by challenging the immunized ferrets  
255 with a high virus titer ( $10^{6.0}$  TCID<sub>50</sub>/mL). Immunized ferrets showed considerably reduced clinical  
256 symptoms, such as body weight loss, cough, runny nose, and movement activity, upon  
257 challenge of high titer SARS-CoV-2. Moreover, RNAscope analyses showed rapid viral  
258 clearance in the lungs of immunized ferrets compared to those of adjuvant only-immunized  
259 ferrets. Histological analysis also showed little or no lung tissue damage and inflammatory  
260 immune cell infiltration in immunized ferrets. As seen from other protein vaccines such as HPV  
261 VLP that requires prime-boost regimens (67), the first immunization alone was not sufficient to  
262 induce neutralizing antibodies. IN + IM immunization elicited more potent protective immunity  
263 upon challenge of high titer SARS-CoV-2 than IM immunization alone, which is consistent with  
264 previous reports showing stronger induction of mucosal immunity upon IN than IM immunization  
265 to protect against respiratory pathogens such as MERS-CoV (65, 66, 68), Influenza virus (69),  
266 and *Mycoplasma pneumoniae* (70). To differentiate vaccine efficacy between IN immunization  
267 and IN and IM immunization, we repeated the viral challenge with high titer ( $10^{6.0}$  TCID<sub>50</sub>/mL)  
268 and observed the improvement of viral clearance in lung and nasal washes from IN and IM-  
269 immunized ferrets. However, as IN and IM immunization was employed together in this study,  
270 further investigation is required to directly compare vaccine efficacy between IN immunization  
271 and IM immunization against SARS-CoV-2 infection. Also, ferrets challenged with  $10^{6.0}$

272 TCID<sub>50</sub>/mL virus titer showed delayed viral clearance compared to ferrets challenged with 10<sup>5.0</sup>  
273 TCID<sub>50</sub>/mL virus titer. However, 10<sup>5.0</sup> TCID<sub>50</sub>/mL is already excessive and not physiologically  
274 relevant to real clinical setting.

275         In this study, we integrated SARS-CoV-2-derived immunogen into self-assembling  
276 nanoparticle to develop an effective vaccine candidate against COVID-19. IM-immunized  
277 animals showed strong induction of neutralizing antibody, rapid clearance of respiratory track  
278 virus, and clear suppression of clinical symptoms, which is further enhanced in combination with  
279 intranasal immunization. However, additional comprehensive studies are needed to understand  
280 the humoral and cellular immunity elicited by RBD-nanoparticle administration and differential  
281 activation of IgA-mediated mucosal immunity upon different immunization routes. Taken  
282 together, our study indicated that immunization with self-assembling SARS-CoV-2 RBD-  
283 nanoparticle elicits protective immunity against SARS-CoV-2 infection, showing its potential as a  
284 vaccine candidate in the midst of the COVID-19 pandemic.

285

## Material and Methods

### 286 Material and Reagents

| REAGENT or RESOURCE                                   | VENDOR                                 | CATALOG NO. |
|-------------------------------------------------------|----------------------------------------|-------------|
| <b>Recombinant DNA</b>                                |                                        |             |
| pFUSEN-hIgG1Fc                                        | Invivogen                              | pfcn-hg1    |
| <i>H. pylori</i> -bullfrog recombinant ferritin       | Jefferey Cohen and Gary Nabel at NIAID |             |
| SARS-CoV-2 Spike codon-optimized to human codon usage | Genscript                              | MC_0101081  |
| <b>Chemicals</b>                                      |                                        |             |
| Polyethylene imine                                    | Polysciences                           | 23966       |
| Valproic acid                                         | Sigma                                  | P4543       |
| AddaVax adjuvant                                      | Invivogen                              | Vac-adx-10  |
| RNAscope reagent                                      | ACD                                    | 322360      |
| RNAscope probe                                        | ACD                                    | 848561      |
| Gill's Hematoxylin #1                                 | Polysciences                           | 24242       |
| <b>Purification</b>                                   |                                        |             |
| Labscale TFF system                                   | Sigma                                  | C1975       |
| TFF filter – 100 kDa MWCO                             | Sigma                                  | PXB100C50   |
| TFF filter – 500 kDa MWCO                             | Sigma                                  | PXB500C50   |
| NGC Medium-pressure liquid chromatography system      | Bio-rad                                |             |
| BioFracFraction collector                             | Bio-rad                                | 7410002     |
| Superdex 200 Increase 10/300 GL                       | Cytiva                                 | 45-002-570  |
| HiPrep 16/60 Sephacryl S-500 HR                       | Cytiva                                 | 28935606    |

287

### 288 Expression vector construction

289 The gene encoding the recombinant ferritin engineered from *Helicobacter pylori* non-  
290 heme ferritin and 2<sup>nd</sup> to 9<sup>th</sup> residues of bullfrog (*Rana catesbeiana*) ferritin lower subunit was a  
291 gift from Gary Nabel (44). Gene encoding Spike of SARS-CoV-2 (GenBank NC\_0101080)  
292 codon-optimized for human codon usage (GenBank MC\_0101081) was purchased from  
293 Genscript (pUC57-2019-nCoV-S). RBD was used to generate a fragment encoding RBD-  
294 SSGGASVLA linker-recombinant ferritin. For expression plasmid, a commercially available  
295 pFUSE vector (Invivogen) was engineered to replace human ferritin light chain gene promoter

296 with SV40 promoter. Genes encoding the recombinant ferritin and the RBD-linker-ferritin  
297 fragment were cloned into the plasmid vector.

298

### 299 **Computer-assisted three-dimensional model of nanoparticles**

300 Previously solved structures of *H. pylori* ferritin nanoparticle (PDB: 3EGM) and SARS-  
301 CoV-2 RBD (PDB: 7JMP) were processed with PyMol (Schrodinger) and Autodesk Meshmixer  
302 (Autodesk). The model was generated to reflect the linker connecting the end of RBD to the  
303 start of *H. pylori* ferritin monomer.

304

### 305 **Expression and purification of nanoparticles**

306 HEK293T cells were directly purchased from American Type Culture Collection (ATCC)  
307 and maintained in DMEM medium (Gibco) supplemented with 10% FBS (Gibco) and 1%  
308 penicillin/streptomycin (Gibco). The cells were transiently transfected with polyethylenimine  
309 (Polysciences) and respective vector plasmids in Opti-MEM and FreeStyle 293 medium (Gibco)  
310 supplemented with 3mM valproic acid. Supernatants containing the nanoparticle were harvested  
311 72 h after transfection and concentrated with Labscale TFF system equipped with 100 kDa and  
312 500 kDa MWCO filters (Millipore Sigma). The concentrates were purified by size exclusion  
313 chromatography (NGC Medium-Pressure Liquid Chromatography, Bio-Rad) using Superdex  
314 200 10/300 GL and HiPrep 16/60 Sephacryl S-500 HR (Cytiva) running degassed PBS at  
315 0.4ml/min. Standard curves were plotted using Gel filtration LMW/HMW calibration Kit (Cytiva)  
316 running at same conditions. Collected fractions were verified for their yield and purity via SDS-  
317 PAGE and stored at -80°C in 10% glycerol (Invitrogen).

318

### 319 **Virus propagation**

320 NMC2019-nCoV02 strain of SARS-CoV-2 was isolated from a patient diagnosed with  
321 COVID-19 and tested positive for SARS-CoV-2 in February, 2020 in South Korea. Vero cells

322 were used to propagate the virus in DMEM medium (Gibco) supplemented with 1%  
323 penicillin/streptomycin (Gibco) at 37°C. The viruses were harvested 72 h later and stored at -  
324 80°C until use.

325

## 326 **Animal Care**

327 Male and female ferrets of 16-20 months old and tested seronegative for Influenza A,  
328 MERS-CoV, and SARS-CoV were purchased from ID Bio Corporation (Cheongju, Korea). The  
329 ferrets were housed in ABSL3 facility within Chungbuk National University (Cheongju, Korea)  
330 with 12 h light/dark cycle with access to water and diet. All animal cares were performed strictly  
331 following the animal care guideline and experiment protocols approved by the Institutional  
332 Animal Care and Use Committee (IACUC) in Chungbuk National University.

333

## 334 **Ferret immunizations and viral challenge**

335 RBD-ferritin nanoparticles (volume: 300ul) and AddaVax adjuvant (volume: 300ul) were  
336 administered into the legs through intramuscular injection and/or intranasal route. Subsequently,  
337 ferrets were intranasally infected with  $10^{5.0}$  or  $10^{6.0}$  TCID<sub>50</sub>/mL SARS-CoV-2. Body weight and  
338 temperature were measured, and veterinary clinical symptoms were observed every day. Blood  
339 and nasal washes were collected every other day for 10 days. Three animals per group were  
340 sacrificed at days 3 and 6 to collect lung tissues with individual scissors. Infectious viruses from  
341 the nasal washes and lung tissues were quantified by inoculation onto Vero cells. Veterinary  
342 symptoms were scored accordingly to our previous publication (57).

343

## 344 **Titration of neutralizing antibody in serum**

345 The neutralizing antibody assay against SARS-CoV-2 was carried out using a micro-  
346 neutralization assay in Vero cells. Collected ferret serum specimens were inactivated at 56°C  
347 for 30 min. Initial 1:2 serum dilutions were made with the medium, and two-fold serial dilutions of



348 all samples were made to a final serum dilution of 1:2 to 1:256. For each well, 50  $\mu$ L of serially  
349 diluted serum was mixed with 50  $\mu$ L (equal volume) of 100 TCID<sub>50</sub> of SARS-CoV-2 and  
350 incubated at 37°C for 1 h to neutralize the infectious virus. The mixtures were then transferred  
351 to Vero cell monolayers. Vero cells were incubated at 37°C in 5% CO<sub>2</sub> for 4 days and monitored  
352 for 50% reduction in cytopathic effect (CPE).

353

### 354 **RNAscope**

355 SARS-CoV-2 RNA (Spike gene) was detected using the Spike-specific probe (Advanced  
356 Cell Diagnostics, Cat. # 848561) and visualized using RNAscope 2.5 HD Reagent Kit RED  
357 (Advanced Cell Diagnostics, Cat. # 322360). Lung tissue sections were fixed in 4% neutral-  
358 buffered formalin and embedded in paraffin, according to the manufacturer's instructions,  
359 followed by counterstaining with 50% Gill's hematoxylin #1 (Polysciences, cat # 24242-1000).  
360 Slides were viewed using Olympus IX 71 (Olympus, Tokyo, Japan) microscope with DP  
361 controller software to capture images.

362

### 363 **Statistical Analysis**

364 All figure asterisks indicate statistical significance compared with adjuvant-only group as  
365 evaluated by the two-way ANOVA Dunnett's multiple comparisons tests (\* indicates  $p < 0.05$ , \*\*  
366 indicates  $p < 0.01$ , \*\*\* indicates  $p < 0.001$  and \*\*\*\* indicates  $p < 0.0001$ ) and were drawn using  
367 GraphPad Prism 8 (GraphPad).

368

369

### **Acknowledgments**

370 *H. pylori*-bullfrog ferritin construct was kindly provided by Drs. Jeffrey Cohen and Gary  
371 Nabel at Vaccine Research Center, NIAID. This work was supported by the National Research  
372 Foundation of Korea (NRF-2020R1A5A2017476, 2020R1A2C3008339), Korea Research  
373 Institute of Bioscience and Biotechnology (KRIBB) Research Initiative Program (KGM9942011),

374 and National Institute of Health (CA200422, CA251275, AI140705, AI140705S, AI140718,  
375 AI152190, AI116585, AI116585S, DE023926, DE027888, and DE028521).

376

377

### **Author Contributions**

378 Y.I.K, D.K., Y.K.C. and J.U.J. conceived the study and designed the experiments. Y.I.K.  
379 and D.K. performed the experiments. K.M.Y., H.S., S.A.L., M.A.C., S.G.J., S.K., W.J. and C.J.L.  
380 helped with the experimental designs and data interpretation/analysis. Y.I.K. and D.K. took the  
381 lead to prepare the manuscript with Y.K.C. and J.U.J.

382

383

### **Competing Financial Interests**

384 Dr. Jae U Jung is a scientific adviser of the Vaccine Stabilization Institute, a California  
385 corporation.

386

## References

- 387 1. Zhu N, Zhang D, Wang W, Li X, Yang B, Song J, Zhao X, Huang B, Shi W, Lu R, Niu P,  
388 Zhan F, Ma X, Wang D, Xu W, Wu G, Gao GF, Tan W, China Novel Coronavirus I,  
389 Research T. 2020. A Novel Coronavirus from Patients with Pneumonia in China, 2019. *N*  
390 *Engl J Med* 382:727-733.
- 391 2. Coronaviridae Study Group of the International Committee on Taxonomy of V. 2020. The  
392 species Severe acute respiratory syndrome-related coronavirus: classifying 2019-nCoV  
393 and naming it SARS-CoV-2. *Nat Microbiol* 5:536-544.
- 394 3. WHO. 2020. Statement on the second meeting of the International Health Regulations  
395 (2005) Emergency Committee regarding the outbreak of novel coronavirus (2019-nCoV).  
396 [https://www.who.int/news/item/30-01-2020-statement-on-the-second-meeting-of-the-](https://www.who.int/news/item/30-01-2020-statement-on-the-second-meeting-of-the-international-health-regulations-(2005)-emergency-committee-regarding-the-outbreak-of-novel-coronavirus-(2019-ncov))  
397 [international-health-regulations-\(2005\)-emergency-committee-regarding-the-outbreak-of-](https://www.who.int/news/item/30-01-2020-statement-on-the-second-meeting-of-the-international-health-regulations-(2005)-emergency-committee-regarding-the-outbreak-of-novel-coronavirus-(2019-ncov))  
398 [novel-coronavirus-\(2019-ncov\)](https://www.who.int/news/item/30-01-2020-statement-on-the-second-meeting-of-the-international-health-regulations-(2005)-emergency-committee-regarding-the-outbreak-of-novel-coronavirus-(2019-ncov)). Accessed Jan 11, 2021.
- 399 4. WHO. 2020. Coronavirus disease 2019 (COVID-19) situation report-63.  
400 [https://www.who.int/docs/default-source/coronaviruse/situation-reports/20200323-sitrep-](https://www.who.int/docs/default-source/coronaviruse/situation-reports/20200323-sitrep-63-covid-19.pdf?sfvrsn=b617302d_4)  
401 [63-covid-19.pdf?sfvrsn=b617302d\\_4](https://www.who.int/docs/default-source/coronaviruse/situation-reports/20200323-sitrep-63-covid-19.pdf?sfvrsn=b617302d_4). Accessed Jan 11, 2021.
- 402 5. GISAIID. Coronavirus COVID-19 Global Cases by Johns Hopkins CSSE.  
403 <https://www.gisaid.org/epiflu-applications/global-cases-covid-19>. Accessed Jan 11, 2021.
- 404 6. Wu Z, McGoogan JM. 2020. Characteristics of and Important Lessons From the  
405 Coronavirus Disease 2019 (COVID-19) Outbreak in China: Summary of a Report of  
406 72314 Cases From the Chinese Center for Disease Control and Prevention. *JAMA*  
407 323:1239-1242.
- 408 7. NIH. 2020. COVID-19 Treatment Guidelines.  
409 <https://www.covid19treatmentguidelines.nih.gov/>. Accessed Jan 11, 2021.
- 410 8. Neil A. Harpen KST. 2020. United States Resource Availability for COVID-19.
- 411 9. Ji Y, Ma Z, Peppelenbosch MP, Pan Q. 2020. Potential association between COVID-19  
412 mortality and health-care resource availability. *The Lancet Global Health* 8.
- 413 10. Yelin D, Wirtheim E, Vetter P, Kalil AC, Bruchfeld J, Runold M, Guaraldi G, Mussini C,  
414 Gudiol C, Pujol M, Bandera A, Scudeller L, Paul M, Kaiser L, Leibovici L. 2020. Long-  
415 term consequences of COVID-19: research needs. *Lancet Infect Dis* 20:1115-1117.
- 416 11. Del Rio C, Collins LF, Malani P. 2020. Long-term Health Consequences of COVID-19.  
417 *JAMA* doi:10.1001/jama.2020.19719.
- 418 12. Wu F, Zhao S, Yu B, Chen YM, Wang W, Song ZG, Hu Y, Tao ZW, Tian JH, Pei YY,  
419 Yuan ML, Zhang YL, Dai FH, Liu Y, Wang QM, Zheng JJ, Xu L, Holmes EC, Zhang YZ.  
420 2020. A new coronavirus associated with human respiratory disease in China. *Nature*  
421 579:265-269.
- 422 13. Chan JF, Kok KH, Zhu Z, Chu H, To KK, Yuan S, Yuen KY. 2020. Genomic  
423 characterization of the 2019 novel human-pathogenic coronavirus isolated from a patient  
424 with atypical pneumonia after visiting Wuhan. *Emerg Microbes Infect* 9:221-236.
- 425 14. Cai Y, Zhang J, Xiao T, Peng H, Sterling SM, Walsh RM, Jr., Rawson S, Rits-Volloch S,  
426 Chen B. 2020. Distinct conformational states of SARS-CoV-2 spike protein. *Science*  
427 369:1586-1592.
- 428 15. Kim YS, Son A, Kim J, Kwon SB, Kim MH, Kim P, Kim J, Byun YH, Sung J, Lee J, Yu JE,  
429 Park C, Kim YS, Cho NH, Chang J, Seong BL. 2018. Chaperna-Mediated Assembly of  
430 Ferritin-Based Middle East Respiratory Syndrome-Coronavirus Nanoparticles. *Front*  
431 *Immunol* 9:1093.
- 432 16. He Y, Zhou Y, Liu S, Kou Z, Li W, Farzan M, Jiang S. 2004. Receptor-binding domain of  
433 SARS-CoV spike protein induces highly potent neutralizing antibodies: implication for  
434 developing subunit vaccine. *Biochem Biophys Res Commun* 324:773-81.

- 435 17. Jiang S, Lu L, Liu Q, Xu W, Du L. 2012. Receptor-binding domains of spike proteins of  
436 emerging or re-emerging viruses as targets for development of antiviral vaccines. *Emerg*  
437 *Microbes Infect* 1:e13.
- 438 18. Pallesen J, Wang N, Corbett KS, Wrapp D, Kirchdoerfer RN, Turner HL, Cottrell CA,  
439 Becker MM, Wang L, Shi W, Kong WP, Andres EL, Kettenbach AN, Denison MR,  
440 Chappell JD, Graham BS, Ward AB, McLellan JS. 2017. Immunogenicity and structures  
441 of a rationally designed prefusion MERS-CoV spike antigen. *Proc Natl Acad Sci U S A*  
442 114:E7348-E7357.
- 443 19. Okba NMA, Muller MA, Li W, Wang C, GeurtsvanKessel CH, Corman VM, Lamers MM,  
444 Sikkema RS, de Bruin E, Chandler FD, Yazdanpanah Y, Le Hingrat Q, Descamps D,  
445 Houhou-Fidouh N, Reusken C, Bosch BJ, Drosten C, Koopmans MPG, Haagmans BL.  
446 2020. Severe Acute Respiratory Syndrome Coronavirus 2-Specific Antibody Responses  
447 in Coronavirus Disease Patients. *Emerg Infect Dis* 26:1478-1488.
- 448 20. Liu L, Wang P, Nair MS, Yu J, Rapp M, Wang Q, Luo Y, Chan JF, Sahi V, Figueroa A,  
449 Guo XV, Cerutti G, Bimela J, Gorman J, Zhou T, Chen Z, Yuen KY, Kwong PD, Sodroski  
450 JG, Yin MT, Sheng Z, Huang Y, Shapiro L, Ho DD. 2020. Potent neutralizing antibodies  
451 against multiple epitopes on SARS-CoV-2 spike. *Nature* 584:450-456.
- 452 21. Liu B, Shi Y, Zhang W, Li R, He Z, Yang X, Pan Y, Deng X, Tan M, Zhao L, Zou F,  
453 Zhang Y, Pan T, Zhang J, Zhang X, Xiao F, Li F, Deng K, Zhang H. 2020. Recovered  
454 COVID-19 patients with recurrent viral RNA exhibit lower levels of anti-RBD antibodies.  
455 *Cell Mol Immunol* 17:1098-1100.
- 456 22. Piccoli L, Park YJ, Tortorici MA, Czudnochowski N, Walls AC, Beltramello M, Silacci-  
457 Fregni C, Pinto D, Rosen LE, Bowen JE, Acton OJ, Jaconi S, Guarino B, Minola A, Zatta  
458 F, Sprugasci N, Bassi J, Peter A, De Marco A, Nix JC, Mele F, Jovic S, Rodriguez BF,  
459 Gupta SV, Jin F, Piumatti G, Lo Presti G, Pellanda AF, Biggiogero M, Tarkowski M,  
460 Pizzuto MS, Cameroni E, Havenar-Daughton C, Smithy M, Hong D, Lepori V, Albanese  
461 E, Ceschi A, Bernasconi E, Elzi L, Ferrari P, Garzoni C, Riva A, Snell G, Sallusto F, Fink  
462 K, Virgin HW, Lanzavecchia A, Corti D, Veesler D. 2020. Mapping Neutralizing and  
463 Immunodominant Sites on the SARS-CoV-2 Spike Receptor-Binding Domain by  
464 Structure-Guided High-Resolution Serology. *Cell* 183:1024-1042 e21.
- 465 23. Wu NC, Yuan M, Liu H, Lee CD, Zhu X, Bangaru S, Torres JL, Caniels TG, Brouwer  
466 PJM, van Gils MJ, Sanders RW, Ward AB, Wilson IA. 2020. An Alternative Binding  
467 Mode of IGHV3-53 Antibodies to the SARS-CoV-2 Receptor Binding Domain. *Cell Rep*  
468 33:108274.
- 469 24. Walsh EE, Frenck RW, Jr., Falsey AR, Kitchin N, Absalon J, Gurtman A, Lockhart S,  
470 Neuzil K, Mulligan MJ, Bailey R, Swanson KA, Li P, Koury K, Kalina W, Cooper D,  
471 Fontes-Garfias C, Shi PY, Tureci O, Tompkins KR, Lyke KE, Raabe V, Dormitzer PR,  
472 Jansen KU, Sahin U, Gruber WC. 2020. Safety and Immunogenicity of Two RNA-Based  
473 Covid-19 Vaccine Candidates. *N Engl J Med* 383:2439-2450.
- 474 25. Baden LR, El Sahly HM, Essink B, Kotloff K, Frey S, Novak R, Diemert D, Spector SA,  
475 Roupael N, Creech CB, McGettigan J, Kehtan S, Segall N, Solis J, Brosz A, Fierro C,  
476 Schwartz H, Neuzil K, Corey L, Gilbert P, Janes H, Follmann D, Marovich M, Mascola J,  
477 Polakowski L, Ledgerwood J, Graham BS, Bennett H, Pajon R, Knightly C, Leav B,  
478 Deng W, Zhou H, Han S, Ivarsson M, Miller J, Zaks T, Group CS. 2020. Efficacy and  
479 Safety of the mRNA-1273 SARS-CoV-2 Vaccine. *N Engl J Med*  
480 doi:10.1056/NEJMoa2035389.
- 481 26. Sadoff J, De Paepe E, Haazen W, Omoruyi E, Bastian AR, Comeaux C, Heijnen E,  
482 Strout C, Schuitemaker H, Callendret B. 2020. Safety and Immunogenicity of the  
483 Ad26.RSV.preF Investigational Vaccine Coadministered With an Influenza Vaccine in  
484 Older Adults. *J Infect Dis* doi:10.1093/infdis/jiaa409.

- 485 27. Keech C, Albert G, Cho I, Robertson A, Reed P, Neal S, Plested JS, Zhu M, Cloney-  
486 Clark S, Zhou H, Smith G, Patel N, Frieman MB, Haupt RE, Logue J, McGrath M,  
487 Weston S, Piedra PA, Desai C, Callahan K, Lewis M, Price-Abbott P, Formica N, Shinde  
488 V, Fries L, Lickliter JD, Griffin P, Wilkinson B, Glenn GM. 2020. Phase 1-2 Trial of a  
489 SARS-CoV-2 Recombinant Spike Protein Nanoparticle Vaccine. *N Engl J Med*  
490 383:2320-2332.
- 491 28. Cohen AA, Gnanapragasam PNP, Lee YE, Hoffman PR, Ou S, Kakutani LM, Keeffe JR,  
492 Wu HJ, Howarth M, West AP, Barnes CO, Nussenzweig MC, Bjorkman PJ. 2021.  
493 Mosaic nanoparticles elicit cross-reactive immune responses to zoonotic coronaviruses  
494 in mice. *Science* doi:10.1126/science.abf6840.
- 495 29. Gause KT, Wheatley AK, Cui J, Yan Y, Kent SJ, Caruso F. 2017. Immunological  
496 Principles Guiding the Rational Design of Particles for Vaccine Delivery. *ACS Nano*  
497 11:54-68.
- 498 30. Link A, Zabel F, Schnetzler Y, Titz A, Brombacher F, Bachmann MF. 2012. Innate  
499 immunity mediates follicular transport of particulate but not soluble protein antigen. *J*  
500 *Immunol* 188:3724-33.
- 501 31. António Roldão MCMM, Leda R Castilho, Manuel J T Carronado, Paula M Alves. 2014.  
502 Virus-like particles in vaccine development. *Expert Rev Vaccines* 9:1149-76.
- 503 32. Qian C, Liu X, Xu Q, Wang Z, Chen J, Li T, Zheng Q, Yu H, Gu Y, Li S, Xia N. 2020.  
504 Recent Progress on the Versatility of Virus-Like Particles. *Vaccines (Basel)* 8.
- 505 33. Braedon Donaldson ZL, Greg F Walker, Sarah L young, Vernon K Ward. 2018. Virus-like  
506 particle vaccines: immunology and formulation for clinical translation. *Expert Rev*  
507 *Vaccines* 17:833-849.
- 508 34. Ingale J, Stano A, Guenaga J, Sharma SK, Nemazee D, Zwick MB, Wyatt RT. 2016.  
509 High-Density Array of Well-Ordered HIV-1 Spikes on Synthetic Liposomal Nanoparticles  
510 Efficiently Activate B Cells. *Cell Rep* 15:1986-99.
- 511 35. Thompson EA, Ols S, Miura K, Rausch K, Narum DL, Spangberg M, Juraska M, Wille-  
512 Reece U, Weiner A, Howard RF, Long CA, Duffy PE, Johnston L, O'Neil CP, Lore K.  
513 2018. TLR-adjuvanted nanoparticle vaccines differentially influence the quality and  
514 longevity of responses to malaria antigen Pfs25. *JCI Insight* 3.
- 515 36. Marcandalli J, Fiala B, Ols S, Perotti M, de van der Schueren W, Snijder J, Hodge E,  
516 Benhaim M, Ravichandran R, Carter L, Sheffler W, Brunner L, Lawrenz M, Dubois P,  
517 Lanzavecchia A, Sallusto F, Lee KK, Velesler D, Correnti CE, Stewart LJ, Baker D, Lore  
518 K, Perez L, King NP. 2019. Induction of Potent Neutralizing Antibody Responses by a  
519 Designed Protein Nanoparticle Vaccine for Respiratory Syncytial Virus. *Cell* 176:1420-  
520 1431 e17.
- 521 37. Yu F, Wang J, Dou J, Yang H, He X, Xu W, Zhang Y, Hu K, Gu N. 2012. Nanoparticle-  
522 based adjuvant for enhanced protective efficacy of DNA vaccine Ag85A-ESAT-6-IL-21  
523 against *Mycobacterium tuberculosis* infection. *Nanomedicine* 8:1337-44.
- 524 38. Kanekiyo M, Wei CJ, Yassine HM, McTamney PM, Boyington JC, Whittle JR, Rao SS,  
525 Kong WP, Wang L, Nabel GJ. 2013. Self-assembling influenza nanoparticle vaccines  
526 elicit broadly neutralizing H1N1 antibodies. *Nature* 499:102-6.
- 527 39. Hu X, Deng Y, Chen X, Zhou Y, Zhang H, Wu H, Yang S, Chen F, Zhou Z, Wang M, Qiu  
528 Z, Liao Y. 2017. Immune Response of A Novel ATR-AP205-001 Conjugate Anti-  
529 hypertensive Vaccine. *Sci Rep* 7:12580.
- 530 40. Pardi N, Hogan MJ, Naradikian MS, Parkhouse K, Cain DW, Jones L, Moody MA,  
531 Verkerke HP, Myles A, Willis E, LaBranche CC, Montefiori DC, Lobby JL, Saunders KO,  
532 Liao HX, Korber BT, Sutherland LL, Scearce RM, Hraber PT, Tombacz I, Muramatsu H,  
533 Ni H, Balikov DA, Li C, Mui BL, Tam YK, Krammer F, Kariko K, Polacino P, Eisenlohr LC,  
534 Madden TD, Hope MJ, Lewis MG, Lee KK, Hu SL, Hensley SE, Cancro MP, Haynes BF,

- 535 Weissman D. 2018. Nucleoside-modified mRNA vaccines induce potent T follicular  
536 helper and germinal center B cell responses. *J Exp Med* 215:1571-1588.
- 537 41. He D, Marles-Wright J. 2015. Ferritin family proteins and their use in bionanotechnology.  
538 *N Biotechnol* 32:651-7.
- 539 42. Cho KJ, Shin HJ, Lee JH, Kim KJ, Park SS, Lee Y, Lee C, Park SS, Kim KH. 2009. The  
540 crystal structure of ferritin from *Helicobacter pylori* reveals unusual conformational  
541 changes for iron uptake. *J Mol Biol* 390:83-98.
- 542 43. Brito C, Matias C, Gonzalez-Nilo FD, Watt RK, Yevenes A. 2014. The C-terminal regions  
543 have an important role in the activity of the ferroxidase center and the stability of  
544 *Chlorobium tepidum* ferritin. *Protein J* 33:211-20.
- 545 44. Kanekiyo M, Bu W, Joyce MG, Meng G, Whittle JR, Baxa U, Yamamoto T, Narpala S,  
546 Todd JP, Rao SS, McDermott AB, Koup RA, Rossmann MG, Mascola JR, Graham BS,  
547 Cohen JI, Nabel GJ. 2015. Rational Design of an Epstein-Barr Virus Vaccine Targeting  
548 the Receptor-Binding Site. *Cell* 162:1090-100.
- 549 45. Kelly HG, Tan HX, Juno JA, Esterbauer R, Ju Y, Jiang W, Wimmer VC, Duckworth BC,  
550 Groom JR, Caruso F, Kanekiyo M, Kent SJ, Wheatley AK. 2020. Self-assembling  
551 influenza nanoparticle vaccines drive extended germinal center activity and memory B  
552 cell maturation. *JCI Insight* 5.
- 553 46. Enkirch T, von Messling V. 2015. Ferret models of viral pathogenesis. *Virology* 479-  
554 480:259-70.
- 555 47. Johnson-Delaney CA, Orosz SE. 2011. Ferret respiratory system: clinical anatomy,  
556 physiology, and disease. *Vet Clin North Am Exot Anim Pract* 14:357-67, vii.
- 557 48. Chan KF, Carolan LA, Druce J, Chappell K, Watterson D, Young P, Korenkov D,  
558 Subbarao K, Barr IG, Laurie KL, Reading PC. 2018. Pathogenesis, Humoral Immune  
559 Responses, and Transmission between Cohoused Animals in a Ferret Model of Human  
560 Respiratory Syncytial Virus Infection. *J Virol* 92.
- 561 49. Oh DY, Lowther S, McCaw JM, Sullivan SG, Leang SK, Haining J, Arkinstall R, Kelso A,  
562 McVernon J, Barr IG, Middleton D, Hurt AC. 2014. Evaluation of oseltamivir prophylaxis  
563 regimens for reducing influenza virus infection, transmission and disease severity in a  
564 ferret model of household contact. *J Antimicrob Chemother* 69:2458-69.
- 565 50. Chan KF, Carolan LA, Korenkov D, Druce J, McCaw J, Reading PC, Barr IG, Laurie KL.  
566 2018. Investigating Viral Interference Between Influenza A Virus and Human Respiratory  
567 Syncytial Virus in a Ferret Model of Infection. *J Infect Dis* 218:406-417.
- 568 51. Cameron MJ, Kelvin AA, Leon AJ, Cameron CM, Ran L, Xu L, Chu YK, Danesh A, Fang  
569 Y, Li Q, Anderson A, Couch RC, Paquette SG, Fomukong NG, Kistner O, Lauchart M,  
570 Rowe T, Harrod KS, Jonsson CB, Kelvin DJ. 2012. Lack of innate interferon responses  
571 during SARS coronavirus infection in a vaccination and reinfection ferret model. *PLoS*  
572 *One* 7:e45842.
- 573 52. Chu YK, Ali GD, Jia F, Li Q, Kelvin D, Couch RC, Harrod KS, Hutt JA, Cameron C,  
574 Weiss SR, Jonsson CB. 2008. The SARS-CoV ferret model in an infection-challenge  
575 study. *Virology* 374:151-63.
- 576 53. Schlottau K, Rissmann M, Graaf A, Schon J, Sehl J, Wylezich C, Hoper D, Mettenleiter  
577 TC, Balkema-Buschmann A, Harder T, Grund C, Hoffmann D, Breithaupt A, Beer M.  
578 2020. SARS-CoV-2 in fruit bats, ferrets, pigs, and chickens: an experimental  
579 transmission study. *Lancet Microbe* 1:e218-e225.
- 580 54. Shi J, Wen Z, Zhong G, Yang H, Wang C, Huang B, Liu R, He X, Shuai L, Sun Z, Zhao  
581 Y, Liu P, Liang L, Cui P, Wang J, Zhang X, Guan Y, Tan W, Wu G, Chen H, Bu Z. 2020.  
582 Susceptibility of ferrets, cats, dogs, and other domesticated animals to SARS-  
583 coronavirus 2. *Science* 368:1016-1020.
- 584 55. Kim YI, Kim SG, Kim SM, Kim EH, Park SJ, Yu KM, Chang JH, Kim EJ, Lee S, Casel  
585 MAB, Um J, Song MS, Jeong HW, Lai VD, Kim Y, Chin BS, Park JS, Chung KH, Foo SS,

- 586 Poo H, Mo IP, Lee OJ, Webby RJ, Jung JU, Choi YK. 2020. Infection and Rapid  
587 Transmission of SARS-CoV-2 in Ferrets. *Cell Host Microbe* 27:704-709 e2.
- 588 56. Ryan KA, Bewley KR, Fotheringham SA, Slack GS, Brown P, Hall Y, Wand NI, Marriott  
589 AC, Cavell BE, Tree JA, Allen L, Aram MJ, Bean TJ, Brunt E, Buttigieg KR, Carter DP,  
590 Cobb R, Coombes NS, Findlay-Wilson SJ, Godwin KJ, Gooch KE, Gouriet J, Halkerston  
591 R, Harris DJ, Hender TH, Humphries HE, Hunter L, Ho CMK, Kennard CL, Leung S,  
592 Longet S, Ngabo D, Osman KL, Paterson J, Penn EJ, Pullan ST, Rayner E, Skinner O,  
593 Steeds K, Taylor I, Tipton T, Thomas S, Turner C, Watson RJ, Wiblin NR, Charlton S,  
594 Hallis B, Hiscox JA, Funnell S, Dennis MJ, et al. 2021. Dose-dependent response to  
595 infection with SARS-CoV-2 in the ferret model and evidence of protective immunity. *Nat*  
596 *Commun* 12:81.
- 597 57. Park SJ, Yu KM, Kim YI, Kim SM, Kim EH, Kim SG, Kim EJ, Casel MAB, Rollon R, Jang  
598 SG, Lee MH, Chang JH, Song MS, Jeong HW, Choi Y, Chen W, Shin WJ, Jung JU, Choi  
599 YK. 2020. Antiviral Efficacies of FDA-Approved Drugs against SARS-CoV-2 Infection in  
600 Ferrets. *mBio* 11.
- 601 58. Holmgren J, Czerkinsky C. 2005. Mucosal immunity and vaccines. *Nat Med* 11:S45-53.
- 602 59. FDA. 2020. Pfizer-BioNTech COVID-19 vaccine (BNT162, PF-07302048) Vaccines and  
603 related biological products advisory committee briefing document. FDA,
- 604 60. FDA. 2020. MRNA-1273 Vaccines and related biological products advisory committee.  
605 FDA,
- 606 61. Tillett RL, Sevinsky JR, Hartley PD, Kerwin H, Crawford N, Gorzalski A, Laverdure C,  
607 Verma SC, Rossetto CC, Jackson D, Farrell MJ, Van Hooser S, Pandori M. 2021.  
608 Genomic evidence for reinfection with SARS-CoV-2: a case study. *Lancet Infect Dis*  
609 21:52-58.
- 610 62. To KK, Hung IF, Ip JD, Chu AW, Chan WM, Tam AR, Fong CH, Yuan S, Tsoi HW, Ng  
611 AC, Lee LL, Wan P, Tso E, To WK, Tsang D, Chan KH, Huang JD, Kok KH, Cheng VC,  
612 Yuen KY. 2020. COVID-19 re-infection by a phylogenetically distinct SARS-coronavirus-  
613 2 strain confirmed by whole genome sequencing. *Clin Infect Dis*  
614 doi:10.1093/cid/ciaa1275.
- 615 63. Gupta V, Bhoyar RC, Jain A, Srivastava S, Upadhyay R, Imran M, Jolly B, Divakar MK,  
616 Sharma D, Sehgal P, Ranjan G, Gupta R, Scaria V, Sivasubbu S. 2020. Asymptomatic  
617 reinfection in two healthcare workers from India with genetically distinct SARS-CoV-2.  
618 *Clin Infect Dis* doi:10.1093/cid/ciaa1451.
- 619 64. Volz E, Hill V, McCrone JT, Price A, Jorgensen D, O'Toole A, Southgate J, Johnson R,  
620 Jackson B, Nascimento FF, Rey SM, Nicholls SM, Colquhoun RM, da Silva Filipe A,  
621 Shepherd J, Pascall DJ, Shah R, Jesudason N, Li K, Jarrett R, Pacchiarini N, Bull M,  
622 Geidelberg L, Siveroni I, Consortium C-U, Goodfellow I, Loman NJ, Pybus OG,  
623 Robertson DL, Thomson EC, Rambaut A, Connor TR. 2021. Evaluating the Effects of  
624 SARS-CoV-2 Spike Mutation D614G on Transmissibility and Pathogenicity. *Cell* 184:64-  
625 75 e11.
- 626 65. Kim MH, Kim HJ, Chang J. 2019. Superior immune responses induced by intranasal  
627 immunization with recombinant adenovirus-based vaccine expressing full-length Spike  
628 protein of Middle East respiratory syndrome coronavirus. *PLoS One* 14:e0220196.
- 629 66. Ma C, Li Y, Wang L, Zhao G, Tao X, Tseng CT, Zhou Y, Du L, Jiang S. 2014. Intranasal  
630 vaccination with recombinant receptor-binding domain of MERS-CoV spike protein  
631 induces much stronger local mucosal immune responses than subcutaneous  
632 immunization: Implication for designing novel mucosal MERS vaccines. *Vaccine*  
633 32:2100-8.
- 634 67. Sankaranarayanan R, Prabhu PR, Pawlita M, Gheit T, Bhatla N, Muwonge R, Nene BM,  
635 Esmay PO, Joshi S, Poli UR, Jivarajani P, Verma Y, Zomawia E, Siddiqi M, Shastri SS,  
636 Jayant K, Malvi SG, Lucas E, Michel A, Butt J, Vijayamma JM, Sankaran S, Kannan TP,

- 637 Varghese R, Divate U, Thomas S, Joshi G, Willhauck-Fleckenstein M, Waterboer T,  
638 Muller M, Sehr P, Hingmire S, Kriplani A, Mishra G, Pimple S, Jadhav R, Sauvaget C,  
639 Tommasino M, Pillai MR, Indian HPV VSG. 2016. Immunogenicity and HPV infection  
640 after one, two, and three doses of quadrivalent HPV vaccine in girls in India: a  
641 multicentre prospective cohort study. *Lancet Oncol* 17:67-77.
- 642 68. Baz M, Samant M, Zekki H, Tribout-Jover P, Plante M, Lanteigne AM, Hamelin ME,  
643 Mallett C, Papadopoulou B, Boivin G. 2012. Effects of different adjuvants in the context  
644 of intramuscular and intranasal routes on humoral and cellular immune responses  
645 induced by detergent-split A/H3N2 influenza vaccines in mice. *Clin Vaccine Immunol*  
646 19:209-18.
- 647 69. Muszkat M, Greenbaum E, Ben-Yehuda A, Oster M, Yeu'l E, Heimann S, Levy R,  
648 Friedman G, Zakay-Rones Z. 2003. Local and systemic immune response in nursing-  
649 home elderly following intranasal or intramuscular immunization with inactivated  
650 influenza vaccine. *Vaccine* 21:1180-6.
- 651 70. Zhu C, Wu Y, Chen S, Yu M, Zeng Y, You X, Xiao J, Wang S. 2012. Protective immune  
652 responses in mice induced by intramuscular and intranasal immunization with a  
653 *Mycoplasma pneumoniae* P1C DNA vaccine. *Can J Microbiol* 58:644-52.
- 654



655 **Table 1. RBD-nanoparticle immunization suppresses clinical symptoms induced by**  
656 **challenge with high SARS-CoV-2 titer.**

| Group<br>(n = 4/group)       | Clinical           | 0 dpi | 1 dpi | 2 dpi | 3 dpi | 4 dpi | 5 dpi | 6 dpi | 7 dpi | 8 dpi | 10 dpi |
|------------------------------|--------------------|-------|-------|-------|-------|-------|-------|-------|-------|-------|--------|
| <b>Adjuvant<br/>only</b>     | Cough              | 0     | 0     | 0.5   | 1     | 1     | 0     | 0     | 0     | 0     | 0      |
|                              | Runny nose         | 0     | 0     | 1.0   | 1     | 1     | 1     | 1     | 0.75  | 0     | 0      |
|                              | Movement, activity | 0     | 0     | 1.25  | 2     | 2     | 1.25  | 0.75  | 0.5   | 0     | 0      |
|                              | Total              | 0     | 0     | 2.75  | 4     | 4     | 2.25  | 1.75  | 1.25  | 0     | 0      |
| <b>RBD-<br/>nanoparticle</b> | Cough              | 0     | 0     | 0     | 0     | 0     | 0     | 0     | 0     | 0     | 0      |
|                              | Runny nose         | 0     | 0     | 0     | 0     | 0     | 0     | 0     | 0     | 0     | 0      |
|                              | Movement, activity | 0     | 0     | 0.75  | 0.5   | 0     | 0     | 0     | 0     | 0     | 0      |
|                              | Total              | 0     | 0     | 0.75  | 0.5   | 0     | 0     | 0     | 0     | 0     | 0      |

657

658

659 **A group of adjuvant-immunized or RBD-nanoparticle IM immunized ferrets were**  
660 **challenged with  $10^{6.0}$  TCID<sub>50</sub>/mL of SARS-CoV-2 and observed for their clinical symptoms**  
661 **– cough, runny nose, movement, and activity. The symptoms were quantified as counts**  
662 **per 30 minutes.**

663

664

## Figure Legends

### 665 **Fig 1. Design and purification of RBD-nanoparticle**

666 A. Computer-assisted modeling of RBD-nanoparticle based on previously solved structures of  
667 *H. pylori* ferritin (PDB: 3EGM) and SARS-CoV-2 RBD (PDB: 7JMP). RBD forms radial  
668 projections on threefold axis point of fully assembled nanoparticle.

669 B. Coomassie staining of purified ferritin-nanoparticle and RBD-nanoparticle following SDS-  
670 PAGE.

671 C. Size exclusion chromatography peaks of the concentrated supernatants from HEK293T  
672 transfected with plasmids encoding secreted ferritin-nanoparticle or RBD-nanoparticles. The  
673 supernatants were concentrated with 100 kDa MWCO and 500 kDa MWCO filters on TFF  
674 system and loaded to Superdex 200 Increase 10/300 GL and HiPrep 16/60 Sephacryl S-500 HR  
675 gel filtration columns on Bio-rad NGC chromatography system, respectively.

676

### 677 **Fig 2. Immunization with RBD-nanoparticle elicits neutralizing antibody formation**

678 A. Immunization schedule of ferrets. At day 31, ferrets were challenged with  $10^{5.0}$  TCID<sub>50</sub>/mL of  
679 SARS-CoV-2 and observed for clinical symptoms for the following 10 days. One group was  
680 immunized with only PBS and adjuvant (only adjuvant-immunized), and two other groups were  
681 immunized with 15µg RBD-nanoparticle in adjuvant with 1:1 ratio for total volume of 600µl.

682 B. Serum neutralization titer of adjuvant-immunized, RBD-nanoparticle IM immunized, or RBD-  
683 nanoparticle IM and IN immunized ferrets. Neutralizing antibody titers against SARS-CoV-2  
684 NMC2019-nCoV02 (100 TCID<sub>50</sub>) of ferritin-nanoparticle immunized groups were measured in  
685 Vero cells with serially diluted ferret sera collected before immunizations at days 0, 14 and 28.

686

### 687 **Fig 3. Immunization with RBD-nanoparticle promotes rapid viral clearance and** 688 **protects ferrets from SARS-CoV-2 challenge**

689 **A. Body temperature change of adjuvant-immunized, RBD-nanoparticle IM immunized, or**  
690 **RBD-nanoparticle IM and IN immunized ferrets upon SARS-CoV-2 challenge.**

691 **B. Body weight change of adjuvant-immunized, RBD-nanoparticle IM immunized, or RBD-**  
692 **nanoparticle IM and IN immunized ferrets upon SARS-CoV-2 challenge.**

693 **C. Viral titer in the nasal washes of adjuvant-immunized, RBD-nanoparticle IM immunized,**  
694 **or RBD-nanoparticle IM and IN immunized ferrets upon SARS-CoV-2 challenge.**

695 D. Viral titer in the lung tissue homogenates of adjuvant-immunized, RBD-nanoparticle IM  
696 immunized, or RBD-nanoparticle IM and IN immunized ferrets upon SARS-CoV-2 challenge.

697

698 **Fig 4. Lung histology and RNAscope of immunized ferrets upon SARS-CoV-2 challenge**

699 Adjuvant-immunized, RBD-nanoparticle IM immunized, or RBD-nanoparticle IM and IN  
700 immunized ferrets were intranasally inoculated with  $10^{5.0}$  TCID<sub>50</sub>/mL of SARS-CoV-2. Tissues  
701 were harvested on 3 and 6 dpi. RNAscope detected SARS-CoV-2 Spike RNA-positive cells in  
702 lung tissues of adjuvant-immunized (A and E), RBD-nanoparticle IM immunized (B and F),  
703 and RBD-nanoparticle IM and IN immunized ferrets (C and G). Mock infected ferret lung (D)  
704 was included as control. Magnification is x100 and scale bars represents 100  $\mu$ m. Insert  
705 indicates the magnification (x400) of SARS-CoV-2-positive image and scale bar represents 20  
706  $\mu$ m. Black arrow indicates SARS-CoV-2 RNA-positive cells.

707

708

709 **Fig S1. Body temperature of RBD-nanoparticle immunized ferrets against challenge with**  
710 **high titer SARS-CoV-2**

711 **Body temperature change of adjuvant-immunized, RBD-nanoparticle IM immunized, or**  
712 **RBD-nanoparticle IM and IN immunized ferrets upon high titer SARS-CoV-2 challenge.**

713

714 **Fig S2. Respiratory virus titer of RBD-nanoparticle immunized ferrets against challenge**  
715 **with high titer SARS-CoV-2**

716 A. Viral titer in nasal washes of adjuvant-immunized, RBD-nanoparticle IM immunized, or RBD-  
717 nanoparticle IM and IN immunized ferrets upon high titer SARS-CoV-2 challenge.

718 B. Viral titer in lungs of adjuvant-immunized, RBD-nanoparticle IM immunized, or RBD-  
719 nanoparticle IM and IN immunized ferrets upon high titer SARS-CoV-2 challenge. Infectious

720 virus titers were measured and shown as mean  $\pm$  SEM.

**Figure 1. Design and purification of RBD-nanoparticle**

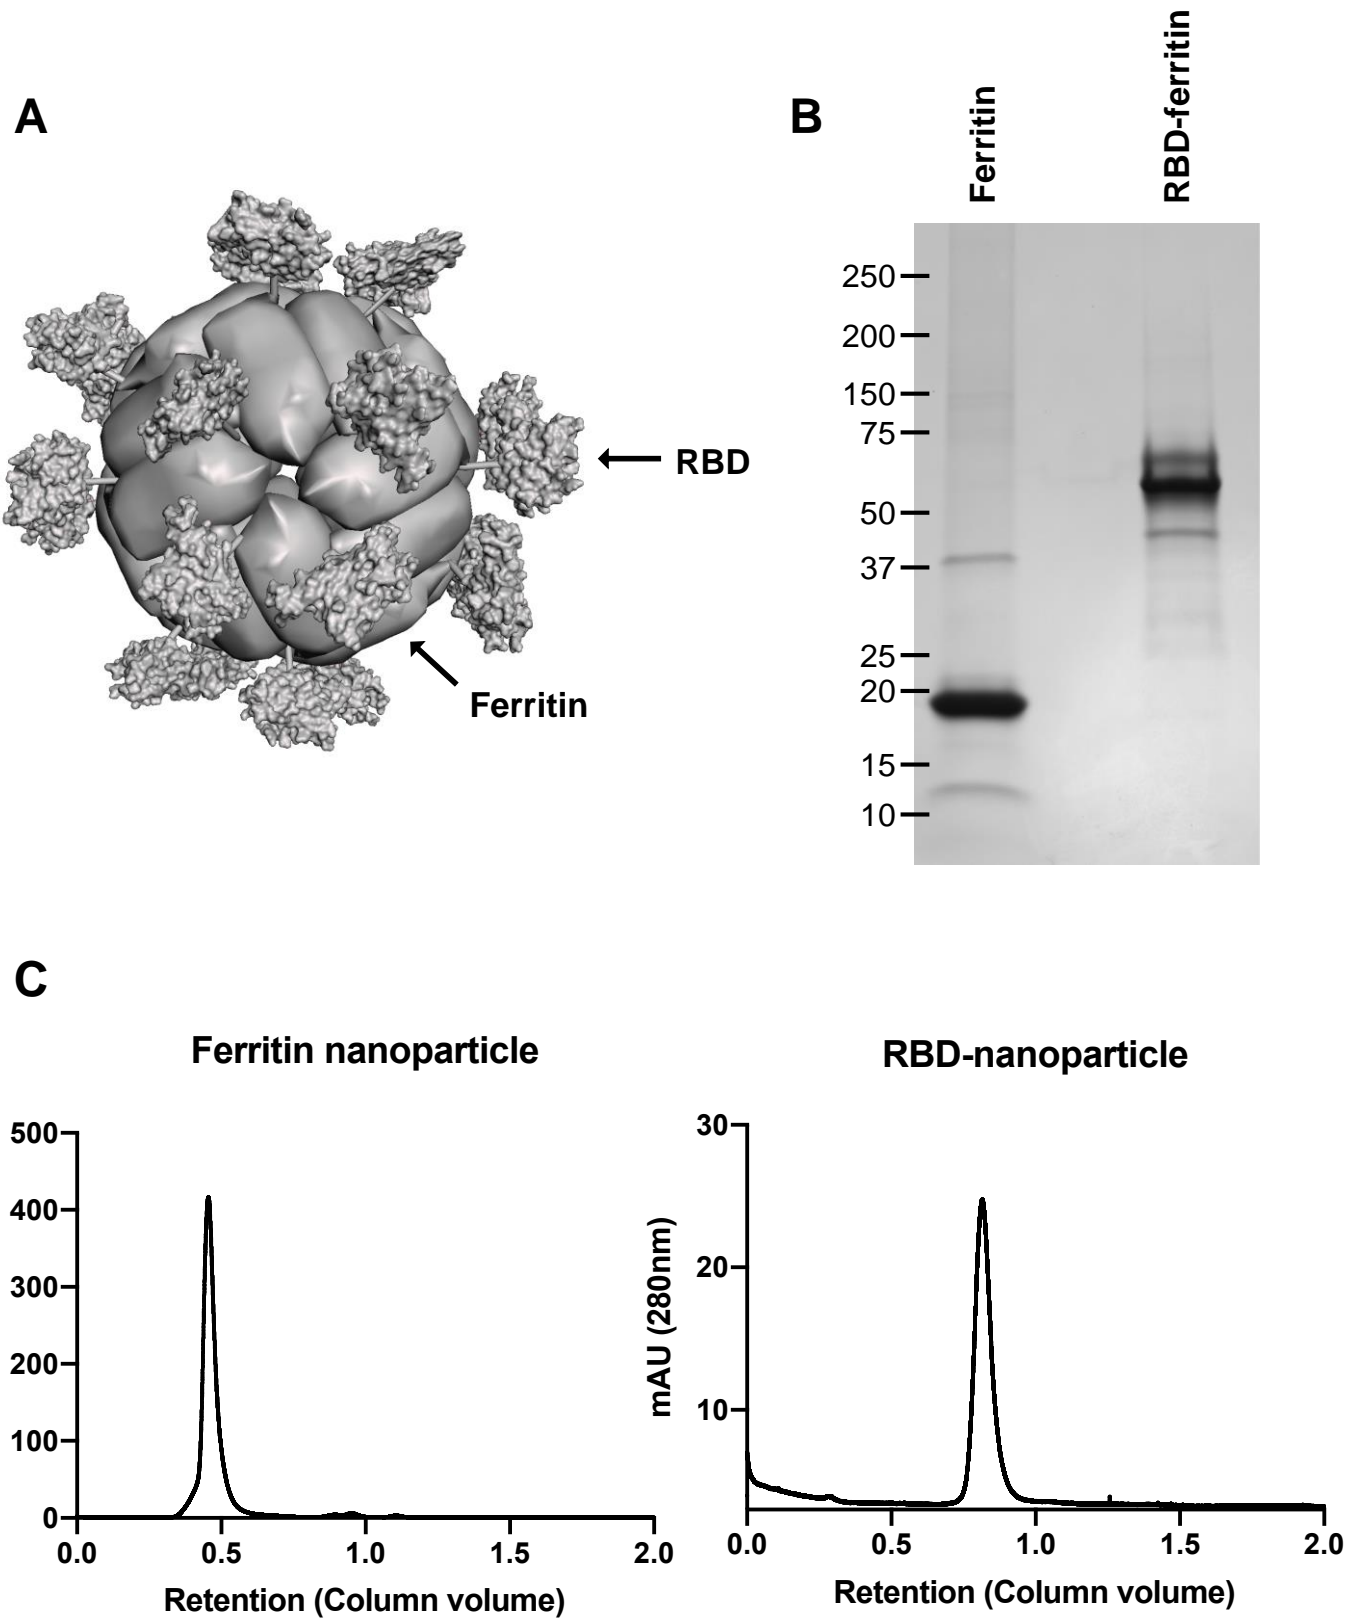

**Figure 2. Immunization with RBD-nanoparticle elicits neutralizing antibody formation**

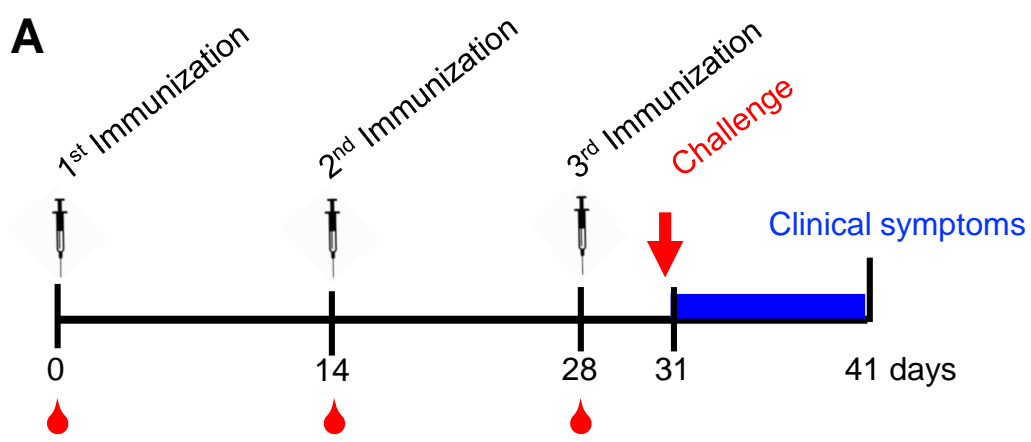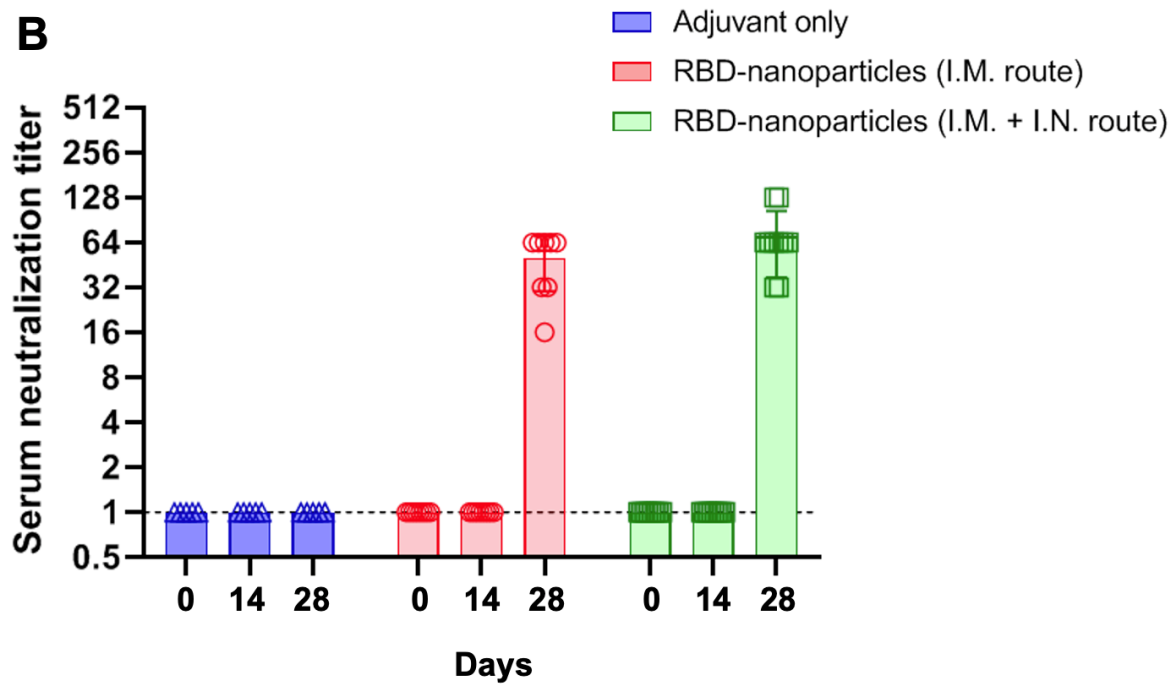

**Figure 3. Immunization with RBD-nanoparticle promotes rapid viral clearance and protects ferrets from SARS-CoV-2 challenge**

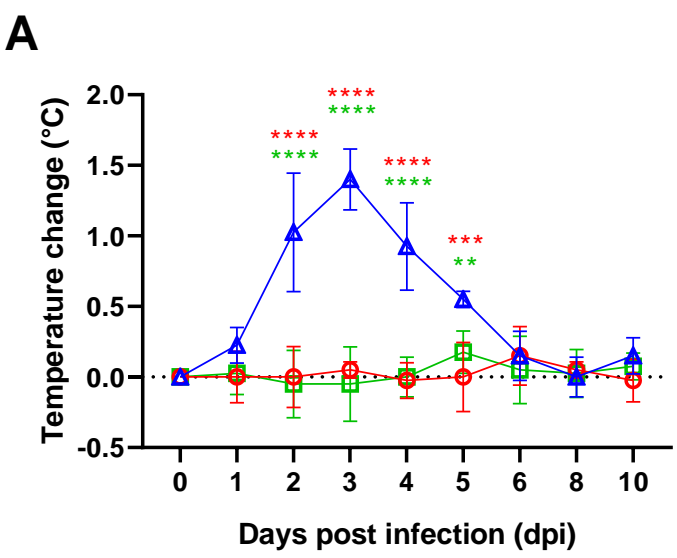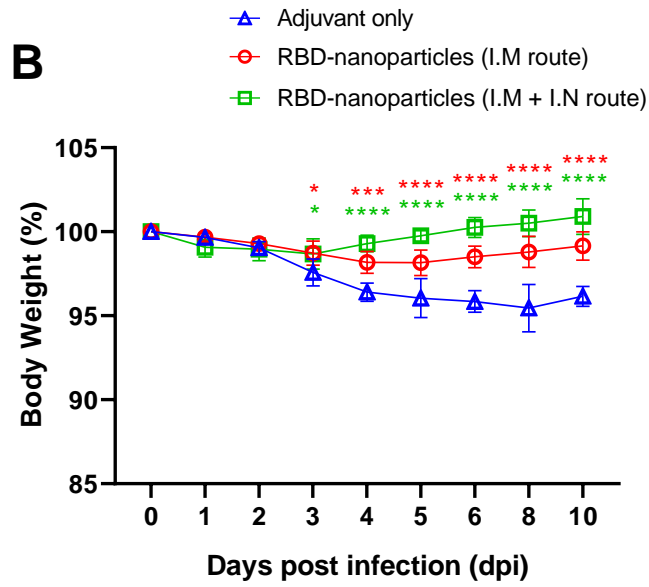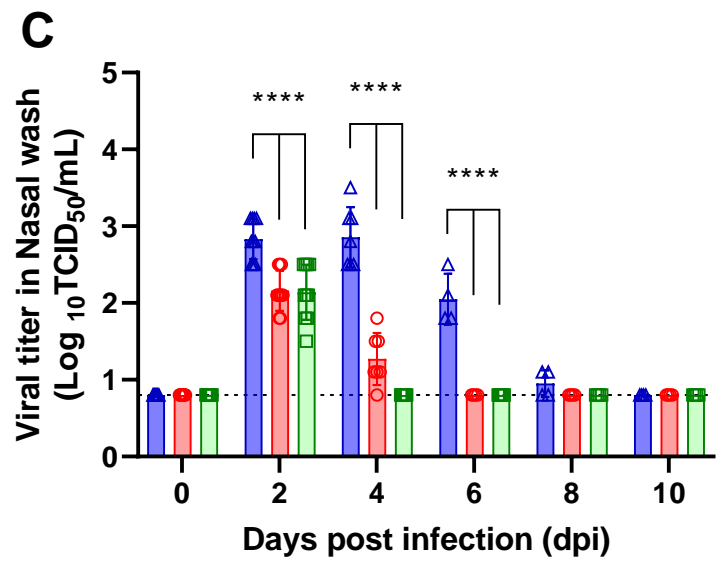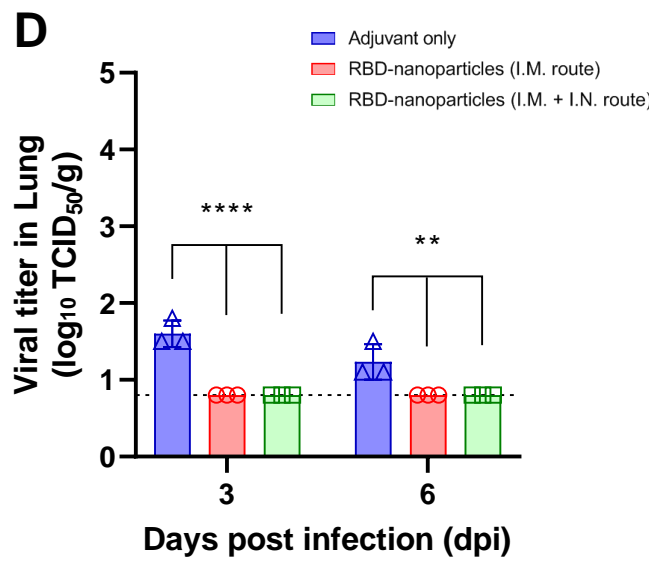

\*  $P < 0.05$ , \*\*  $P < 0.01$ , \*\*\*  $P < 0.001$ , and \*\*\*\*  $P < 0.0001$

**Figure 4. Lung histology and RNAscope of immunized ferrets upon SARS-CoV-2 challenge**

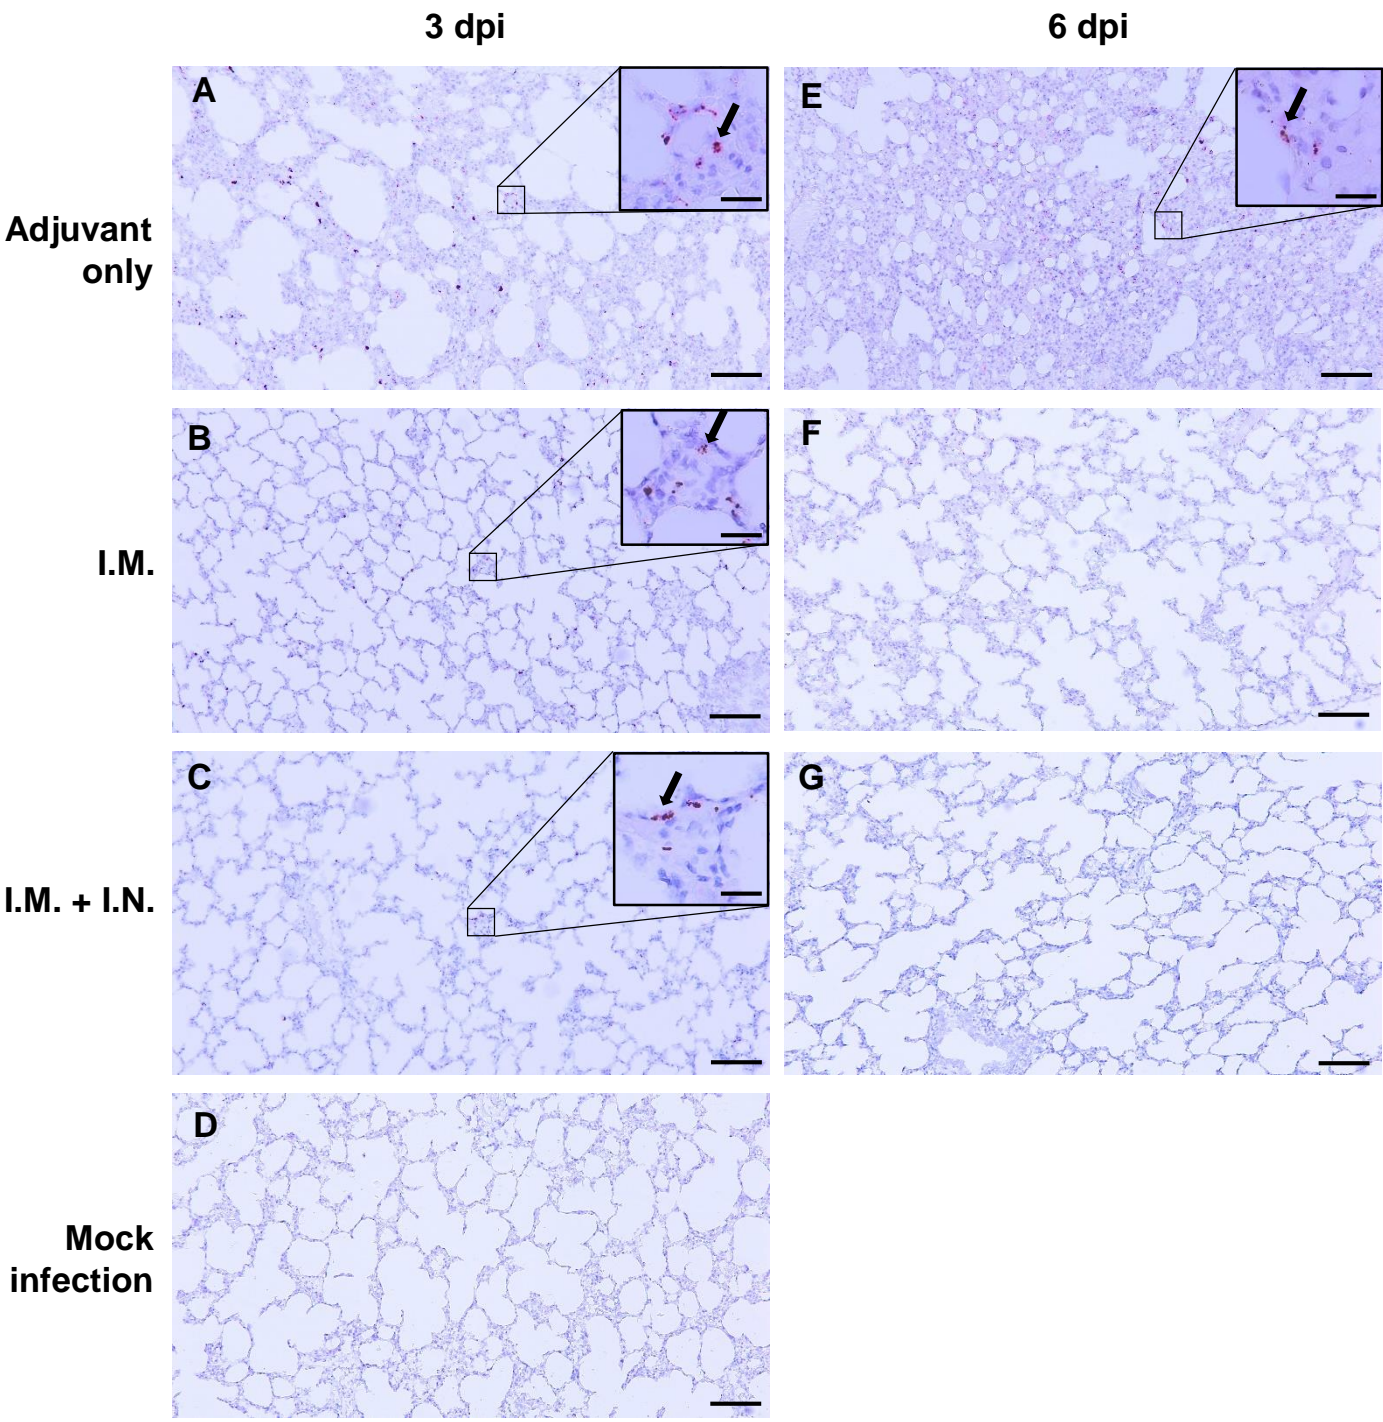

Source: https://www.biorxiv.org/content/biorxiv/early/2021/01/29/2021.01.28.428743.full.pdf
